# Supplementary material for: Physical exercise improves quality of life, depressive symptoms, and cognition across chronic brain disorders: a transdiagnostic systematic review and meta-analysis of randomized controlled trials
Source: PubMed Central journal article supplement (PMC7990819; doi:10.1007/s00415-019-09493-9), 2019-08-14
Supplement: 415_2019_9493_MOESM1_ESM.pdf [file 415_2019_9493_MOESM1_ESM.pdf]

**Physical exercise improves quality of life, depressive symptoms, and cognition across chronic brain disorders: a transdiagnostic systematic review and meta-analysis of randomized controlled trials**

Meenakshi Dauwan<sup>\*</sup>, Marieke JH Begemann, Margot IE Slot, Edwin HM Lee, Philip Scheltens, Iris EC Sommer

**\* Corresponding author:**

Meenakshi Dauwan, M.D.  
 Neuroimaging Center, University Medical Center Groningen  
 Department of Clinical Neurophysiology and MEG Center, Amsterdam UMC, Vrije Universiteit Amsterdam  
 Department of Psychiatry, University Medical Center Utrecht  
 Neuroimaging Center 3111  
 Antonius Deusinglaan 2  
 9713 AW Groningen, The Netherlands  
 Tel: +31 88 75 57468  
 E-mail: [m.dauwan@umcg.nl](mailto:m.dauwan@umcg.nl); [m.dauwan-3@umcutrecht.nl](mailto:m.dauwan-3@umcutrecht.nl)

**Table S1: Systematic search strategy for two out of four used databases for one disorder**

| PUBMED                                                                                                                                                                                                                                                                           |
|----------------------------------------------------------------------------------------------------------------------------------------------------------------------------------------------------------------------------------------------------------------------------------|
| <b>#1: Domain</b><br>(Alzheimer[Title/Abstract] OR AD[Title/Abstract])                                                                                                                                                                                                           |
| <b>#2: Determinant</b><br>(Exercise[Title/Abstract] OR physical[Title/Abstract] OR training[Title/Abstract] OR endurance[Title/Abstract] OR aerobic[Title/Abstract] OR anaerobic[Title/Abstract] OR resistance[Title/Abstract] OR sport[Title/Abstract] OR yoga[Title/Abstract]) |
| <b>#3: #1 AND #2</b>                                                                                                                                                                                                                                                             |
| EMBASE                                                                                                                                                                                                                                                                           |
| <b>#1: Domain</b><br>(Alzheimer OR AD):ab,ti                                                                                                                                                                                                                                     |
| <b>#2: Determinant</b><br>(Exercise OR physical OR training OR endurance OR aerobic OR anaerobic OR resistance OR sport OR yoga):ab,ti                                                                                                                                           |
| <b>#3: #1 AND #2</b>                                                                                                                                                                                                                                                             |
