# Supplementary material for: Physical exercise improves quality of life, depressive symptoms, and cognition across chronic brain disorders: a transdiagnostic systematic review and meta-analysis of randomized controlled trials
Source: PubMed Central journal article supplement (PMC7990819; doi:10.1007/s00415-019-09493-9), 2019-08-14
Supplement: 415_2019_9493_MOESM2_ESM.pdf [file 415_2019_9493_MOESM2_ESM.pdf]

**Physical exercise improves quality of life, depressive symptoms, and cognition across chronic brain disorders: a transdiagnostic systematic review and meta-analysis of randomized controlled trials**

Meenakshi Dauwan\*, Marieke JH Begemann, Margot IE Slot, Edwin HM Lee, Philip Scheltens, Iris EC Sommer

**\* Corresponding author:**

Meenakshi Dauwan, M.D.  
Neuroimaging Center, University Medical Center Groningen  
Department of Clinical Neurophysiology and MEG Center, Amsterdam UMC, Vrije Universiteit Amsterdam  
Department of Psychiatry, University Medical Center Utrecht  
Neuroimaging Center 3111  
Antonius Deusinglaan 2  
9713 AW Groningen, The Netherlands  
Tel: +31 88 75 57468  
E-mail: [m.dauwan@umcg.nl](mailto:m.dauwan@umcg.nl); [m.dauwan-3@umcutrecht.nl](mailto:m.dauwan-3@umcutrecht.nl)

**Table S2: Cognitive domains classified based on the cognitive domains and/or cognitive tests investigated across studies and disorders**

---

**Attention & Working Memory**

---

'Alertness' and 'Shift of attention' subtests of computerized 'Test Battery of Attention'  
Digit Span forward  
Digit Vigilance Test  
Dual-task Timed Up and Go (TUG)  
Letter Cancellation Test  
Memory with Interference test  
Modified Flanker task  
Rapid visual information processing  
Spatial working memory  
Useful Field of View task  
Wechsler Memory Scale (WMS)-III: Working Memory: Spatial Span & Letter-Number-Span  
Working memory for patterns

---

**Executive Functioning**

---

Clock Drawing Test  
Delis-Kaplan Executive Function System  
Digit Span backward  
Frontal Assessment Battery  
Raven colored progressive matrices  
Ruff 2 & 7 test  
Stroop test (congruent score)  
Subset 3 of 'Achievement Testing System' (Leistungsprüfsystem)  
Trail Making Test (TMT) Part B  
TMT-B minus TMT-A  
Wisconsin Card Sorting test

---

**Memory**

---

Alzheimer's Disease Assessment Scale – Cognitive Subscale (ADAS-Cog) verbal memory test  
Brief Visuospatial Memory Test-Revised

Hong Kong List Learning Test (HKLLT)  
Hopkins Verbal Learning Test-Revised  
Paired Associate Learning  
Pattern Recognition Memory  
Rey Auditory Verbal Learning test  
Verbal Learning and Memory test  
WMS Logical Memory subtest  
WMS Verbal Paired Associates subtest  
WMS Visual Reproduction Subtest

---

**Psychomotor Speed**

---

Brief Assessment of cognition in Schizophrenia (BACS): Symbol Coding + category fluency: animal naming (1 score)  
FETZ-test  
Paced Auditory Serial Addition Test (PASAT)  
Stroop test (incongruent score)  
Symbol Digit Modalities Test (SDMT)  
TMT-A  
Wechsler Adult Intelligence Scale-Revised (WAIS-R) Digit Symbol Subtest

---

**Verbal Fluency**

---

Controlled Oral Word Association test  
Regensburg Verbal Fluency test  
Semantic Word Fluency with CERAD and FAS-test  
Verbal Fluency test (animal category)

---

**Global Cognition**

---

ADAS-Cog  
Cambridge Cognitive Examination (CAMCOG)  
French ERFC (Rapid Evaluation of Cognitive Function)  
Mini Mental State Examination (MMSE)  
Montreal Cognitive Assessment (MoCA)  
Unified Huntington's Disease Rating Scale (UHDRS) cognitive scale

---
