# Supplementary material for: Physical exercise improves quality of life, depressive symptoms, and cognition across chronic brain disorders: a transdiagnostic systematic review and meta-analysis of randomized controlled trials
Source: PubMed Central journal article supplement (PMC7990819; doi:10.1007/s00415-019-09493-9), 2019-08-14
Supplement: 415_2019_9493_MOESM3_ESM.pdf [file 415_2019_9493_MOESM3_ESM.pdf]

**Physical exercise improves quality of life, depressive symptoms, and cognition across chronic brain disorders: a transdiagnostic systematic review and meta-analysis of randomized controlled trials**

Meenakshi Dauwan\*, Marieke JH Begemann, Margot IE Slot, Edwin HM Lee, Philip Scheltens, Iris EC Sommer

**\* Corresponding author:**

Meenakshi Dauwan, M.D.

Neuroimaging Center, University Medical Center Groningen

Department of Clinical Neurophysiology and MEG Center, Amsterdam UMC, Vrije Universiteit Amsterdam

Department of Psychiatry, University Medical Center Utrecht

Neuroimaging Center 3111

Antonius Deusinglaan 2

9713 AW Groningen, The Netherlands

Tel: +31 88 75 57468

E-mail: [m.dauwan@umcg.nl](mailto:m.dauwan@umcg.nl); [m.dauwan-3@umcutrecht.nl](mailto:m.dauwan-3@umcutrecht.nl)

**Supplementary text**

Formulas used to compute effect sizes

The effect sizes have been calculated in Comprehensive Meta-Analysis according to the following formula (Hedges 1981, Distribution theory for Glass's estimator of effect size and related estimators. Journal of Educational Statistics 6, 107-128):

$$d = \frac{\bar{x}_1 - \bar{x}_2}{s^*}$$

with  $d$  = effect size,  $x_1$  and  $x_2$  = sample means and  $s^*$  = pooled standard deviation, computed as:

$$s^* = \sqrt{\frac{(n_1 - 1)s_1^2 + (n_2 - 1)s_2^2}{n_1 + n_2 - 2}}$$

with  $n_1$  and  $n_2$  the two sample sizes  $s_1^2$  and  $s_2^2$  the estimated population variances of both groups

Unbiased effect size estimated (Hedges'  $g$ ) =

$$g = J \times d,$$

with J computed as:

$$J = 1 - \frac{3}{4df - 1}$$

J = correction factor used to convert d to Hedges' g with df = degrees of freedom used to estimate the pooled standard deviation which for two independent groups is  $n_1 + n_2 - 2$ .

Two examples of how Comprehensive Meta-Analysis computes Hedges' g are shown below:

**Example 1: when pre- and post-mean data was available from studies:**

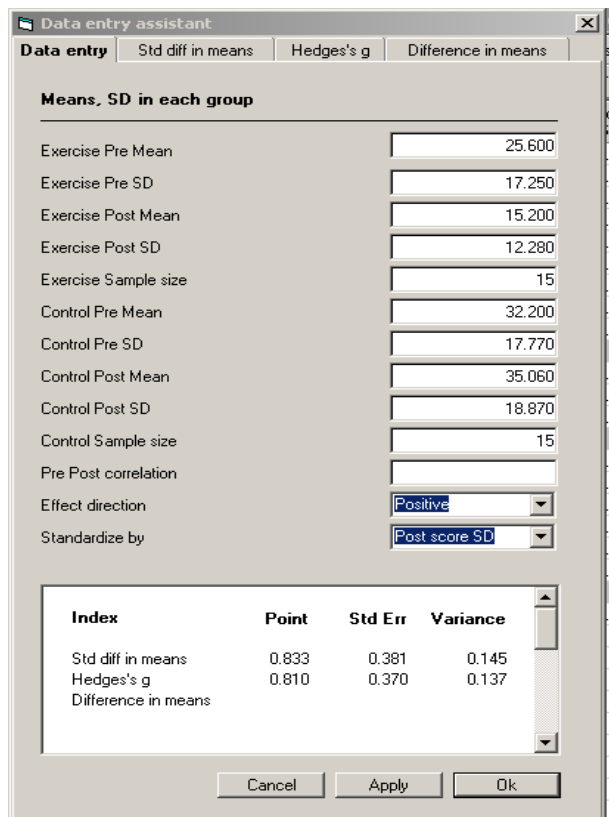

**Standardized difference in means**

Starting with

Mean change, SD difference, N, in each group, Pre/Post Corr

Standardized difference in means

**\*\* Option to standardize by Post SD \*\***

MeanChange(1) = Group 1 mean difference  
 MeanChange(2) = Group 2 mean difference  
 RawDiff = MeanChange(1) - MeanChange(2)

SDPost(1) = Given

SDPost(2) = Given

$$SDPostPooled = \text{Sqr}(((n(1) - 1) * SDPost(1) ^ 2 + (n(2) - 1) * SDPost(2) ^ 2) / (n(1) + n(2) - 2))$$

$$StdPostDiff = \text{RawDiff} / SDPostPooled$$

$$StdPostDiffSE = \text{Sqr}(((1 / n(1) + 1 / n(2)) + StdPostDiff ^ 2 / (2 * (n(1) + n(2)))))$$

$$\text{RawDiff} = -10.400 - 2.860 = -13.260$$

$$SDPost(1) = 12.280$$

$$SDPost(2) = 18.870$$

$$SDPostPooled = \text{Sqr}(((15 - 1) * 12.280 ^ 2 + (15 - 1) * 18.870 ^ 2) / (15 + 15 - 2)) = 15.920$$

$$StdPostDiff = -13.260 / 15.920 = -0.833$$

$$StdPostDiffSE = \text{Sqr}(((1 / 15 + 1 / 15) + -0.833 ^ 2 / (2 * (15 + 15)))) = 0.381$$

### **Hedges' g**

Standardized mean difference corrected for bias (Hedges' g)

The program computes the Standardized mean difference (d) and then multiplies d by a correction factor (J) to compute g.

Correction factor J

$$J = 1 - (3 / (4 * df - 1))$$

Where df = NTot - 2

$$J = 1 - (3 / (4 * 28 - 1)) = 0.973$$

Computation of g

$$g = d * J$$

$$\text{StdErr}(g) = \text{StdErr}(d) * J$$

$$\text{Variance}(g) = \text{StdErr}(g) ^ 2$$

$$g = 0.833 * 0.973 = 0.810$$

$$\text{StdErr}(g) = 0.381 * 0.973 = 0.370$$

$$\text{Variance}(g) = 0.370 ^ 2 = 0.137$$

**Example 2: when mean change data was available from studies:**

| Index               | Point | Std Err | Variance |
|---------------------|-------|---------|----------|
| Std diff in means   | 1.410 | 0.529   | 0.280    |
| Hedges's g          | 1.343 | 0.504   | 0.254    |
| Difference in means | 6.000 | 2.018   | 4.073    |

## Standardized difference in means

Starting with

Mean change, SD difference, N, in each group, Pre/Post Corr

Standardized difference in means

**\*\* Option to standardize by Change SD \*\***

RawDiff = MeanChange(1) - MeanChange(2)

SDChangePooled =  $\text{Sqr}(\frac{(n(1) - 1) * \text{SDChange}(1)^2 + (n(2) - 1) * \text{SDChange}(2)^2}{n(1) + n(2) - 2})$

StdChangeDiff = RawDiff / SDChangePooled

StdChangeDiffSE =  $\text{Sqr}(\frac{1}{n(1)} + \frac{1}{n(2)} + \frac{\text{StdChangeDiff}^2}{2 * (n(1) + n(2))})$

RawDiff = -6.000 - 0.000 = -6.000

SDChangePooled =  $\text{Sqr}(\frac{(10 - 1) * 4.590^2 + (8 - 1) * 3.780^2}{10 + 8 - 2}) = 4.255$

StdChangeDiff = -6.000 / 4.255 = -1.410

StdChangeDiffSE =  $\text{Sqr}(\frac{1}{10} + \frac{1}{8} + \frac{-1.410^2}{2 * (10 + 8)}) = 0.529$

## Hedges' g

Standardized mean difference corrected for bias (Hedges' g)

The program computes the Standardized mean difference (d) and then multiplies d by a correction factor (J) to compute g.

Correction factor J

$J = 1 - \frac{3}{4 * df - 1}$

Where  $df = NTot - 2$

$$J = 1 - (3 / (4 * 16 - 1)) = 0.952$$

Computation of  $g$

$$g = d * J$$

$$StdErr(g) = StdErr(d) * J$$

$$Variance(g) = StdErr(g) ^ 2$$

$$g = 1.410 * 0.952 = 1.343$$

$$StdErr(g) = 0.529 * 0.952 = 0.504$$

$$Variance(g) = 0.504 ^ 2 = 0.254$$

### **Acknowledgement**

The authors gratefully acknowledge the corresponding authors of the studies that provided additional information upon request:

Prof. Dr. Cynthia L. Comella; Dr. Erin R. Foster; Prof. Dr. Steen G. Hasselbalch; Prof. Dr. Linda Tickle-Degnen; Dr. Victoria Goodwin; Dr. Patricia A. Kinser; Prof. Dr. C.M. Wiles; Dr. Elaine H. Coulter; Dr. Lorna Paul; Dr. C.C. Harro; Dr. Mark B. Andersen, Dr. U. Dalgas, Dr. H. Negahban; Dr. D. Veale; Dr. T. Carter; Dr. F. Schuch; Prof. Dr. O. P. Almeida; Dr. B. Sangelaji; Dear dr. Martiny; Dr. M. Niemi; Dr. A. Vreugdenhil; Prof. Dr. M. Busse; Dr. D.K. Lee; Prof. Dr. C. Dettmers; Prof. Dr. D. T. Wade; Dr. M. Steinberg; Prof. Dr. A. Chetta; Dr. A. Solari; Dr. M.G. Ceravolo; Dr. A. Park; Dr. L.M. Shulman; Dr. E. Eftekhari; Dr. M. Morris; Dr. M. Shahidi; DR. M. Kelson; Prof. Dr. M.R. Ziman; Prof. Dr. B.S. Oken; Dr. T. Cruickshank; Dr. M. Danoudis; Dr. J. Krogh; Dr. C. Heesen; Dr. S.M. Gold; Dr. P. Suttanon; Prof. Dr. A. Ashburn; Dr. F. Patti; Dr. L. Teri; Dr. K. Dashtipour; Dr. P. Hoang; Prof. Dr. S. Lord; Dr. R. Machado-Vieira; Dr. M. Kim; Dr. C.C. Siqueira
