# Supplementary material for: Physical exercise improves quality of life, depressive symptoms, and cognition across chronic brain disorders: a transdiagnostic systematic review and meta-analysis of randomized controlled trials
Source: PubMed Central journal article supplement (PMC7990819; doi:10.1007/s00415-019-09493-9), 2019-08-14
Supplement: 415_2019_9493_MOESM6_ESM.pdf [file 415_2019_9493_MOESM6_ESM.pdf]

**Physical exercise improves quality of life, depressive symptoms, and cognition across chronic brain disorders: a transdiagnostic systematic review and meta-analysis of randomized controlled trials**

Meenakshi Dauwan\*, Marieke JH Begemann, Margot IE Slot, Edwin HM Lee, Philip Scheltens, Iris EC Sommer

**\* Corresponding author:**

Meenakshi Dauwan, M.D.

Neuroimaging Center, University Medical Center Groningen

Department of Clinical Neurophysiology and MEG Center, Amsterdam UMC, Vrije Universiteit Amsterdam

Department of Psychiatry, University Medical Center Utrecht

Neuroimaging Center 3111

Antonius Deusinglaan 2

9713 AW Groningen, The Netherlands

Tel: +31 88 75 57468

E-mail: [m.dauwan@umcg.nl](mailto:m.dauwan@umcg.nl); [m.dauwan-3@umcutrecht.nl](mailto:m.dauwan-3@umcutrecht.nl)

Table S5: Results for all outcome measures based on studies that performed intention-to-treat (ITT) analysis

| Outcome measure                       | Studies (N) | Patients (IG/CG) | Hedges' g   | 95% CI              | p-value          | Q-statistic (df)                | I <sup>2</sup> (%) | Egger's test                  | N <sub>R</sub> |
|---------------------------------------|-------------|------------------|-------------|---------------------|------------------|---------------------------------|--------------------|-------------------------------|----------------|
| <b>QoL</b>                            | 38          | 1277/1228        | <b>0.56</b> | <b>0.37 to 0.74</b> | <b>&lt;.0001</b> | <b>Q(37)=182.89, p&lt;.0001</b> | <b>80</b>          | <b>t(36)=4.29, p&lt;.0001</b> | <b>1132</b>    |
| <i>Without outlier</i>                | 33          | 1222/1179        | <b>0.44</b> | <b>0.27 to 0.61</b> | <b>&lt;.0001</b> | <b>Q(32)=127.91, p&lt;.0001</b> | <b>75</b>          | <b>t(31)=3.18, p=.003</b>     | <b>636</b>     |
| <b>Depressive symptoms</b>            | 37          | 1027/808         | <b>0.90</b> | <b>0.62 to 1.18</b> | <b>&lt;.0001</b> | <b>Q(36)=268.64, p&lt;.0001</b> | <b>87</b>          | <b>t(35)=4.76, p&lt;.0001</b> | <b>1808</b>    |
| <i>Without outlier</i>                | 26          | 873/682          | <b>0.62</b> | <b>0.38 to 0.86</b> | <b>&lt;.0001</b> | <b>Q(25)=119.83, p&lt;.0001</b> | <b>79</b>          | <b>t(24)=3.66, p=.001</b>     | <b>617</b>     |
| <b>Cognition</b>                      |             |                  |             |                     |                  |                                 |                    |                               |                |
| <b>Attention &amp; Working memory</b> | 14          | 586/372          | 0.21        | -0.03 to 0.46       | .089             | Q(13)=32.54, p=.002             | 60                 | t(12)=1.94, p=.076            |                |
| <i>Without outlier</i>                | 8           | 533/321          | 0.12        | -0.20 to 0.43       | .462             | Q(7)=26.78, p<.0001             | 74                 | t(6)=0.98, p=.366             |                |
| <b>Executive functioning</b>          | 9           | 441/289          | 0.12        | -0.04 to 0.28       | .152             | Q(8)=9.54, p=.299               | 16                 | t(7)=0.24, p=.814             |                |
| <i>Without outlier</i>                | 5           | 410/259          | 0.13        | -0.02 to 0.27       | .086             | Q(4)=2.06, p=.724               | 0                  | t(3)=1.78, p=.173             |                |
| <b>Memory</b>                         | 8           | 477/310          | 0.09        | -0.04 to 0.21       | .191             | Q(7)=4.21, p=.755               | 0                  | t(6)=0.48, p=.649             |                |
| <i>Without outlier</i>                | 6           | 461/292          | 0.08        | -0.06 to 0.21       | .265             | Q(5)=3.73, p=.589               | 0                  | t(4)=1.56, p=.194             |                |
| <b>Psychomotor speed</b>              | 12          | 369/303          | <b>0.24</b> | <b>0.05 to 0.43</b> | <b>.015</b>      | Q(11)=15.60, p=.157             | 29                 | <b>t(10)=2.28, p=.046</b>     | <b>22</b>      |
| <i>Without outlier</i>                | 6           | 314/248          | 0.10        | -0.05 to 0.25       | .196             | Q(5)=4.46, p=.485               | 0                  | t(4)=0.62, p=.570             |                |
| <b>Verbal fluency</b>                 | 5           | 292/227          | 0.20        | -0.13 to 0.53       | .229             | Q(4)=12.89, p=.012              | 69                 | t(3)=2.67, p=.076             |                |
| <i>Without outliers</i>               | 4           | 277/212          | 0.02        | -0.17 to 0.21       | .825             | Q(3)=3.77, p=.287               | 20                 | t(2)=1.47, p=.280             |                |
| <b>Global cognition</b>               | 12          | 335/306          | 0.33        | -0.07 to 0.73       | .108             | Q(11)=60.23, p<.0001            | 82                 | t(10)=0.19, p=.855            |                |
| <i>Without outliers</i>               | 8           | 290/266          | <b>0.60</b> | <b>0.19 to 1.00</b> | <b>.004</b>      | <b>Q(7)=34.55, p&lt;.0001</b>   | <b>80</b>          | t(6)=2.25, p=.065             |                |

CG=Control group; df=degrees of freedom; IG=Intervention group; N<sub>R</sub>=Rosenthal's fail-safe number
