# Supplementary material for: Physical exercise improves quality of life, depressive symptoms, and cognition across chronic brain disorders: a transdiagnostic systematic review and meta-analysis of randomized controlled trials
Source: PubMed Central journal article supplement (PMC7990819; doi:10.1007/s00415-019-09493-9), 2019-08-14
Supplement: 415_2019_9493_MOESM8_ESM.pdf [file 415_2019_9493_MOESM8_ESM.pdf]

**Physical exercise improves quality of life, depressive symptoms, and cognition across chronic brain disorders: a transdiagnostic systematic review and meta-analysis of randomized controlled trials**

Meenakshi Dauwan<sup>\*</sup>, Marieke JH Begemann, Margot IE Slot, Edwin HM Lee, Philip Scheltens, Iris EC

Sommer

**\* Corresponding author:**

Meenakshi Dauwan, M.D.

Neuroimaging Center, University Medical Center Groningen

Department of Clinical Neurophysiology and MEG Center, Amsterdam UMC, Vrije Universiteit  
Amsterdam

Department of Psychiatry, University Medical Center Utrecht

Neuroimaging Center 3111

Antonius Deusinglaan 2

9713 AW Groningen, The Netherlands

Tel: +31 88 75 57468

E-mail: [m.dauwan@umcg.nl](mailto:m.dauwan@umcg.nl); [m.dauwan-3@umcutrecht.nl](mailto:m.dauwan-3@umcutrecht.nl)

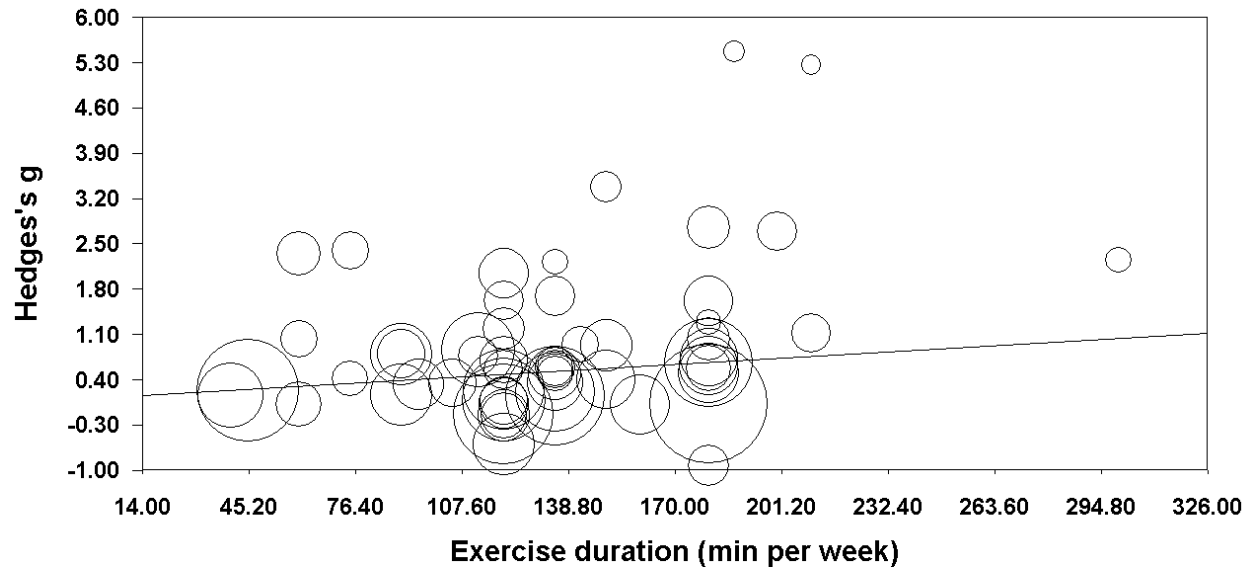

Figure S1: Meta-regression of exercise time (minutes/week) on depressive symptoms
