# Supplementary material for: Physical exercise improves quality of life, depressive symptoms, and cognition across chronic brain disorders: a transdiagnostic systematic review and meta-analysis of randomized controlled trials
Source: PubMed Central journal article supplement (PMC7990819; doi:10.1007/s00415-019-09493-9), 2019-08-14
Supplement: 415_2019_9493_MOESM12_ESM.pdf [file 415_2019_9493_MOESM12_ESM.pdf]

**Physical exercise improves quality of life, depressive symptoms, and cognition across chronic brain disorders: a transdiagnostic systematic review and meta-analysis of randomized controlled trials**

Meenakshi Dauwan\*, Marieke JH Begemann, Margot IE Slot, Edwin HM Lee, Philip Scheltens, Iris EC Sommer

**\* Corresponding author:**

Meenakshi Dauwan, M.D.

Neuroimaging Center, University Medical Center Groningen

Department of Clinical Neurophysiology and MEG Center, Amsterdam UMC, Vrije

Universiteit Amsterdam

Department of Psychiatry, University Medical Center Utrecht

Neuroimaging Center 3111

Antonius Deusinglaan 2

9713 AW Groningen, The Netherlands

Tel: +31 88 75 57468

E-mail: [m.dauwan@umcg.nl](mailto:m.dauwan@umcg.nl); [m.dauwan-3@umcutrecht.nl](mailto:m.dauwan-3@umcutrecht.nl)

Supplementary figure 2: results of quality of life

| Study           | Hedges' g | p-value | Intervention (N) | Control (N) | 95% CI per study | Std residual | p-value |
|-----------------|-----------|---------|------------------|-------------|------------------|--------------|---------|
| Aguiar 2014     | 0.569     | 0.096   | 17               | 17          | -0.101 to 1.239  | 0.32         | 0.75    |
| Ahmadi 2010a    | 0.696     | 0.075   | 10               | 10          | -0.071 to 1.463  | 0.53         | 0.59    |
| Ahmadi 2010b    | 0.714     | 0.057   | 11               | 10          | -0.022 to 1.450  | 0.58         | 0.56    |
| Allen 2010      | 0.195     | 0.507   | 21               | 24          | -0.382 to 0.772  | -0.41        | 0.68    |
| Ashburn 2007    | -0.372    | 0.033   | 67               | 66          | -0.712 to -0.031 | -1.75        | 0.08    |
| Battaglia 2013  | 2.319     | 0.000   | 10               | 8           | 1.310 to 3.328   | 2.94         | 0.00    |
| Belton 2014     | -0.186    | 0.639   | 12               | 12          | -0.960 to 0.589  | -1.03        | 0.30    |
| Brenes 2007     | -0.595    | 0.082   | 14               | 12          | -1.265 to 0.075  | -1.88        | 0.06    |
| Busse 2013      | 0.923     | 0.027   | 9                | 9           | 0.103 to 1.743   | 0.91         | 0.36    |
| Cakit 2010      | 0.190     | 0.575   | 24               | 9           | -0.475 to 0.855  | -0.39        | 0.69    |
| Canning 2012    | -0.088    | 0.844   | 9                | 9           | -0.969 to 0.792  | -0.81        | 0.42    |
| Canning 2014    | -0.111    | 0.311   | 104              | 115         | -0.326 to 0.104  | -1.22        | 0.22    |
| Carroll 2017    | 0.604     | 0.192   | 10               | 8           | -0.303 to 1.511  | 0.34         | 0.74    |
| Carta 2008      | 0.379     | 0.253   | 10               | 20          | -0.271 to 1.029  | -0.04        | 0.97    |
| Carter 2014     | 0.425     | 0.008   | 60               | 60          | 0.109 to 0.741   | 0.06         | 0.95    |
| Carter 2015     | 0.175     | 0.412   | 44               | 43          | -0.243 to 0.592  | -0.49        | 0.62    |
| Cholewa 2013    | 0.711     | 0.004   | 40               | 30          | 0.229 to 1.194   | 0.67         | 0.51    |
| Clarke 2016     | -0.048    | 0.535   | 348              | 347         | -0.200 to 0.104  | -1.09        | 0.28    |
| Dalgas 2010b    | 0.603     | 0.052   | 15               | 16          | -0.004 to 1.210  | 0.41         | 0.69    |
| Dodd 2011       | 0.348     | 0.141   | 36               | 35          | -0.116 to 0.812  | -0.11        | 0.92    |
| Doulatabad 2013 | 1.262     | 0.000   | 30               | 30          | 0.713 to 1.810   | 1.76         | 0.08    |
| Duff 2018       | 0.108     | 0.726   | 15               | 15          | -0.496 to 0.712  | -0.57        | 0.57    |
| Ebrahimi 2015   | 0.295     | 0.344   | 16               | 14          | -0.315 to 0.905  | -0.20        | 0.84    |
| Garett 2012a    | 0.358     | 0.008   | 193              | 49          | 0.095 to 0.621   | -0.09        | 0.93    |
| Goodwin 2011    | -0.101    | 0.575   | 61               | 62          | -0.452 to 0.251  | -1.13        | 0.26    |
| Hoffmann 2015   | -0.139    | 0.338   | 102              | 88          | -0.423 to 0.145  | -1.25        | 0.21    |
| Hogan 2014      | 0.198     | 0.182   | 97               | 15          | -0.093 to 0.489  | -0.46        | 0.64    |
| Huang 2015      | 1.026     | 0.000   | 19               | 20          | 0.458 to 1.594   | 1.27         | 0.20    |

|                    |              |              |             |             |                 |       |      |
|--------------------|--------------|--------------|-------------|-------------|-----------------|-------|------|
| Ikai 2013          | -0.128       | 0.649        | 25          | 24          | -0.680 to 0.424 | -1.07 | 0.28 |
| Kaltsatou 2014     | 0.979        | 0.008        | 16          | 15          | 0.251 to 1.707  | 1.06  | 0.29 |
| Kargarfard 2012    | 3.368        | 0.000        | 10          | 11          | 2.234 to 4.502  | 4.22  | 0.00 |
| Keus 2007          | -0.449       | 0.235        | 14          | 13          | -1.191 to 0.292 | -1.53 | 0.13 |
| Khalil 2013        | -0.076       | 0.835        | 11          | 10          | -0.791 to 0.639 | -0.87 | 0.38 |
| Khan 2008          | 0.031        | 0.862        | 46          | 46          | -0.320 to 0.382 | -0.83 | 0.41 |
| Learmonth 2012     | 0.081        | 0.821        | 20          | 12          | -0.617 to 0.779 | -0.59 | 0.56 |
| Learmonth 2017     | 0.076        | 0.770        | 29          | 28          | -0.436 to 0.589 | -0.67 | 0.50 |
| Liao 2015a         | 1.853        | 0.000        | 12          | 12          | 0.919 to 2.787  | 2.34  | 0.02 |
| Lin 2015           | 0.525        | 0.007        | 69          | 33          | 0.143 to 0.907  | 0.29  | 0.77 |
| Maci 2012          | 1.862        | 0.002        | 7           | 7           | 0.663 to 3.061  | 2.00  | 0.05 |
| Miller 2011        | 0.815        | 0.028        | 15          | 15          | 0.089 to 1.541  | 0.76  | 0.44 |
| Negahban 2013      | 0.558        | 0.109        | 12          | 12          | -0.124 to 1.240 | 0.30  | 0.76 |
| Ni 2016a           | 1.062        | 0.015        | 13          | 10          | 0.210 to 1.914  | 1.12  | 0.26 |
| Ni 2016b           | 0.777        | 0.061        | 14          | 10          | -0.036 to 1.591 | 0.66  | 0.51 |
| Oken 2004          | -0.013       | 0.960        | 37          | 19          | -0.517 to 0.491 | -0.86 | 0.39 |
| Paul 2014          | 0.225        | 0.535        | 15          | 14          | -0.485 to 0.935 | -0.32 | 0.75 |
| Plow 2014          | 0.417        | 0.247        | 14          | 16          | -0.289 to 1.123 | 0.04  | 0.97 |
| Quinn 2014         | 0.177        | 0.631        | 15          | 13          | -0.546 to 0.900 | -0.40 | 0.69 |
| Qutubuddin 2013    | 0.287        | 0.482        | 13          | 10          | -0.512 to 1.086 | -0.19 | 0.85 |
| Romberg 2005       | 0.051        | 0.772        | 47          | 48          | -0.294 to 0.396 | -0.79 | 0.43 |
| Romenets 2015      | 0.053        | 0.876        | 18          | 15          | -0.615 to 0.722 | -0.65 | 0.51 |
| Sangelaji 2014     | 0.821        | 0.001        | 39          | 22          | 0.357 to 1.285  | 0.91  | 0.36 |
| Santos 2017        | 1.556        | 0.000        | 13          | 15          | 0.728 to 2.384  | 1.99  | 0.05 |
| Schuch 2015        | 0.872        | 0.001        | 25          | 25          | 0.376 to 1.368  | 1.00  | 0.32 |
| Silva-Batista 2016 | 1.121        | 0.002        | 26          | 13          | 0.414 to 1.828  | 1.34  | 0.18 |
| Singh 1997b        | 0.366        | 0.225        | 17          | 15          | -0.225 to 0.957 | -0.06 | 0.95 |
| Storr 2006         | -0.306       | 0.154        | 37          | 50          | -0.732 to 0.115 | -1.55 | 0.12 |
| Tarakci 2013       | 0.238        | 0.234        | 51          | 48          | -0.154 to 0.631 | -0.35 | 0.72 |
| Teri 2003          | 0.668        | 0.000        | 68          | 72          | 0.329 to 1.007  | 0.62  | 0.54 |
| Tickle-Degnen 2010 | 0.902        | 0.000        | 39          | 40          | 0.443 to 1.361  | 1.08  | 0.28 |
| Vermohlen 2018     | 0.868        | 0.000        | 30          | 37          | 0.413 to 1.323  | 1.01  | 0.31 |
| Visceglia 2011     | 1.211        | 0.005        | 10          | 8           | 0.370 to 2.052  | 1.38  | 0.17 |
| Wade 2003          | -0.199       | 0.243        | 53          | 41          | -0.533 to 0.135 | -1.37 | 0.17 |
| Yeung 2012         | 0.000        | 1.000        | 25          | 13          | -0.656 to 0.656 | -0.76 | 0.45 |
| Zhang 2004         | -0.119       | 0.592        | 40          | 40          | -0.553 to 0.316 | -1.12 | 0.26 |
|                    | <b>0.397</b> | <b>0.000</b> | <b>2349</b> | <b>1985</b> | 0.273 to 0.521  |       |      |
