# Supplementary material for: Physical exercise improves quality of life, depressive symptoms, and cognition across chronic brain disorders: a transdiagnostic systematic review and meta-analysis of randomized controlled trials
Source: PubMed Central journal article supplement (PMC7990819; doi:10.1007/s00415-019-09493-9), 2019-08-14
Supplement: 415_2019_9493_MOESM13_ESM.pdf [file 415_2019_9493_MOESM13_ESM.pdf]

**Physical exercise improves quality of life, depressive symptoms, and cognition across chronic brain disorders: a transdiagnostic systematic review and meta-analysis of randomized controlled trials**

Meenakshi Dauwan\*, Marieke JH Begemann, Margot IE Slot, Edwin HM Lee, Philip Scheltens, Iris EC Sommer

**\* Corresponding author:**

Meenakshi Dauwan, M.D.

Neuroimaging Center, University Medical Center Groningen

Department of Clinical Neurophysiology and MEG Center, Amsterdam UMC, Vrije

Universiteit Amsterdam

Department of Psychiatry, University Medical Center Utrecht

Neuroimaging Center 3111

Antonius Deusinglaan 2

9713 AW Groningen, The Netherlands

Tel: +31 88 75 57468

E-mail: [m.dauwan@umcg.nl](mailto:m.dauwan@umcg.nl); [m.dauwan-3@umcutrecht.nl](mailto:m.dauwan-3@umcutrecht.nl)

Supplementary figure 3: results of depressive symptoms

| Study             | Hedges' g | p-value | Intervention (N) | Control (N) | 95% CI per study | Std residual | p-value |
|-------------------|-----------|---------|------------------|-------------|------------------|--------------|---------|
| Ahmadi 2013       | 0.580     | 0.122   | 21               | 10          | -0.156 to 1.316  | -0.26        | 0.80    |
| Blumenthal 2007   | 0.153     | 0.377   | 104              | 49          | -0.186 to 0.492  | -0.89        | 0.38    |
| Brenes 2007       | 1.026     | 0.012   | 14               | 12          | 0.229 to 1.823   | 0.30         | 0.76    |
| Briken 2014       | 0.768     | 0.078   | 11               | 10          | -0.086 to 1.622  | -0.02        | 0.98    |
| Cakit 2010        | 0.024     | 0.949   | 24               | 9           | -0.717 to 0.765  | -0.96        | 0.33    |
| Carneiro 2015     | 0.942     | 0.043   | 9                | 10          | 0.032 to 1.853   | 0.19         | 0.85    |
| Carter 2015       | 0.245     | 0.251   | 44               | 43          | -0.173 to 0.663  | -0.74        | 0.46    |
| Chan 2012         | 0.795     | 0.025   | 17               | 16          | 0.102 to 1.488   | 0.01         | 0.99    |
| Chou 2004         | 2.218     | 0.001   | 7                | 7           | 0.939 to 3.497   | 1.51         | 0.13    |
| Cugusi 2015       | 0.549     | 0.209   | 10               | 10          | -0.308 to 1.405  | -0.29        | 0.77    |
| Dalgas 2010b      | 0.703     | 0.052   | 15               | 16          | -0.005 to 1.411  | -0.10        | 0.92    |
| Danielsson 2014   | 2.043     | 0.000   | 42               | 20          | 1.361 to 2.725   | 1.63         | 0.10    |
| Doose 2015        | 1.614     | 0.000   | 30               | 16          | 0.932 to 2.295   | 1.07         | 0.28    |
| Foster 2013       | -0.601    | 0.032   | 26               | 26          | -1.148 to -0.053 | -1.86        | 0.06    |
| Hebert 2012       | 0.328     | 0.329   | 25               | 13          | -0.331 to 0.987  | -0.59        | 0.55    |
| Hoffmann 2015     | 0.028     | 0.848   | 102              | 88          | -0.256 to 0.312  | -1.07        | 0.28    |
| Huang 2015        | 0.925     | 0.005   | 19               | 20          | 0.277 to 1.574   | 0.18         | 0.85    |
| Kerling 2015      | 0.355     | 0.245   | 22               | 20          | -0.244 to 0.954  | -0.57        | 0.57    |
| Khatri 2001       | 0.212     | 0.328   | 42               | 42          | -0.213 to 0.637  | -0.79        | 0.43    |
| Kinser 2014       | 0.418     | 0.386   | 12               | 6           | -0.526 to 1.361  | -0.43        | 0.66    |
| Learmonth 2012    | 0.348     | 0.332   | 20               | 12          | -0.355 to 1.051  | -0.56        | 0.58    |
| Learmonth 2017    | 0.158     | 0.546   | 29               | 28          | -0.355 to 0.671  | -0.85        | 0.40    |
| Legrand 2015      | 1.619     | 0.000   | 15               | 12          | 0.766 to 2.472   | 1.02         | 0.31    |
| Legrand 2016      | 1.121     | 0.009   | 14               | 10          | 0.276 to 1.966   | 0.41         | 0.68    |
| Lin 2015          | 0.615     | 0.037   | 42               | 15          | 0.037 to 1.193   | -0.22        | 0.82    |
| Luttenberger 2015 | 0.752     | 0.012   | 22               | 25          | 0.169 to 1.336   | -0.04        | 0.97    |
| Maci 2012         | 2.247     | 0.001   | 7                | 7           | 0.961 to 3.533   | 1.54         | 0.12    |
| Marzolini 2009    | 1.287     | 0.048   | 4                | 6           | 0.013 to 2.561   | 0.53         | 0.60    |

|                              |              |              |             |             |                  |       |      |
|------------------------------|--------------|--------------|-------------|-------------|------------------|-------|------|
| Miller 2011                  | 0.075        | 0.832        | 15          | 15          | -0.621 to 0.772  | -0.91 | 0.36 |
| Mota-Pereira 2011            | 5.470        | 0.000        | 19          | 10          | 3.878 to 7.062   | 4.39  | 0.00 |
| Murri 2015                   | 0.659        | 0.001        | 79          | 42          | 0.277 to 1.041   | -0.17 | 0.86 |
| Niemi 2016                   | 2.349        | 0.000        | 28          | 18          | 1.594 to 3.103   | 1.98  | 0.05 |
| Oertel-Knöchel 2014<br>(Dep) | 0.496        | 0.302        | 8           | 8           | -0.446 to 1.438  | -0.34 | 0.73 |
| Oken 2004                    | 0.166        | 0.547        | 37          | 20          | -0.374 to 0.706  | -0.83 | 0.41 |
| Paul 2014                    | 0.069        | 0.848        | 15          | 14          | -0.639 to 0.778  | -0.92 | 0.36 |
| Petajan 1996                 | 0.400        | 0.174        | 21          | 25          | -0.176 to 0.976  | -0.51 | 0.61 |
| Picelli 2016                 | 0.579        | 0.220        | 9           | 8           | -0.346 to 1.504  | -0.24 | 0.81 |
| Pilu 2007                    | 1.184        | 0.004        | 10          | 20          | 0.387 to 1.981   | 0.50  | 0.62 |
| Prakhinkit 2014              | 2.395        | 0.000        | 27          | 13          | 1.497 to 3.293   | 1.94  | 0.05 |
| Prathikanti 2017             | -0.931       | 0.025        | 15          | 10          | -1.747 to -0.116 | -2.13 | 0.03 |
| Quinn 2014                   | -0.157       | 0.670        | 15          | 13          | -0.879 to 0.565  | -1.20 | 0.23 |
| Razazian 2016                | 2.752        | 0.000        | 36          | 18          | 1.970 to 3.534   | 2.47  | 0.01 |
| Rolland 2007                 | -0.131       | 0.447        | 67          | 67          | -0.468 to 0.206  | -1.28 | 0.20 |
| Romberg 2005                 | -0.148       | 0.469        | 47          | 48          | -0.547 to 0.252  | -1.29 | 0.20 |
| Romenets 2015                | 0.032        | 0.925        | 18          | 15          | -0.637 to 0.701  | -0.98 | 0.33 |
| Schuch 2015                  | 0.718        | 0.013        | 25          | 25          | 0.154 to 1.281   | -0.09 | 0.93 |
| Shahidi 2011                 | 0.786        | 0.005        | 40          | 20          | 0.239 to 1.333   | 0.00  | 1.00 |
| Sharma 2017                  | 5.267        | 0.000        | 13          | 12          | 3.621 to 6.912   | 4.12  | 0.00 |
| Singh 1997b                  | 3.374        | 0.000        | 17          | 15          | 2.306 to 4.443   | 2.94  | 0.00 |
| Singh 2001                   | 1.691        | 0.000        | 15          | 14          | 0.860 to 2.522   | 1.12  | 0.26 |
| Singh 2005                   | 0.500        | 0.081        | 35          | 19          | -0.061 to 1.061  | -0.38 | 0.70 |
| Siqueira 2016                | 0.008        | 0.979        | 20          | 28          | -0.557 to 0.572  | -1.04 | 0.30 |
| Sutherland 2001              | 0.588        | 0.161        | 11          | 11          | -0.235 to 1.410  | -0.24 | 0.81 |
| Teri 2003                    | 0.239        | 0.157        | 68          | 72          | -0.092 to 0.570  | -0.77 | 0.44 |
| Thompson 2013                | 1.026        | 0.026        | 9           | 11          | 0.124 to 1.928   | 0.29  | 0.77 |
| Tsang 2006                   | 0.861        | 0.000        | 48          | 34          | 0.406 to 1.315   | 0.11  | 0.92 |
| Tsang 2012                   | 0.497        | 0.125        | 21          | 17          | -0.139 to 1.133  | -0.38 | 0.71 |
| Vreugdenhil 2012             | 2.691        | 0.000        | 20          | 20          | 1.844 to 3.538   | 2.34  | 0.02 |
| Wade 2003                    | 0.091        | 0.658        | 53          | 41          | -0.313 to 0.496  | -0.96 | 0.34 |
| Yeung 2012                   | -0.156       | 0.641        | 25          | 13          | -0.813 to 0.501  | -1.22 | 0.22 |
|                              | <b>0.784</b> | <b>0.000</b> | <b>1635</b> | <b>1274</b> | 0.592 to 1.011   |       |      |
