# Supplementary material for: Physical exercise improves quality of life, depressive symptoms, and cognition across chronic brain disorders: a transdiagnostic systematic review and meta-analysis of randomized controlled trials
Source: PubMed Central journal article supplement (PMC7990819; doi:10.1007/s00415-019-09493-9), 2019-08-14
Supplement: 415_2019_9493_MOESM14_ESM.pdf [file 415_2019_9493_MOESM14_ESM.pdf]

**Physical exercise improves quality of life, depressive symptoms, and cognition across chronic brain disorders: a transdiagnostic systematic review and meta-analysis of randomized controlled trials**

Meenakshi Dauwan\*, Marieke JH Begemann, Margot IE Slot, Edwin HM Lee, Philip Scheltens, Iris EC Sommer

**\* Corresponding author:**

Meenakshi Dauwan, M.D.

Neuroimaging Center, University Medical Center Groningen

Department of Clinical Neurophysiology and MEG Center, Amsterdam UMC, Vrije Universiteit Amsterdam

Department of Psychiatry, University Medical Center Utrecht

Neuroimaging Center 3111

Antonius Deusinglaan 2

9713 AW Groningen, The Netherlands

Tel: +31 88 75 57468

E-mail: [m.dauwan@umcg.nl](mailto:m.dauwan@umcg.nl); [m.dauwan-3@umcutrecht.nl](mailto:m.dauwan-3@umcutrecht.nl)

Supplementary figure 4: results of cognition

**Attention & Working Memory**

| Study                     | Hedges' g    | p-value      | Intervention (N) | Control (N) | 95% CI per study      | Std residual | p-value |
|---------------------------|--------------|--------------|------------------|-------------|-----------------------|--------------|---------|
| Arcoverde 2014            | -0.294       | 0.495        | 10               | 10          | -1.138 to 0.551       | -1.05        | 0.29    |
| Belton 2014               | 0.029        | 0.942        | 12               | 12          | -0.744 to 0.801       | -0.44        | 0.66    |
| Bhatia 2017               | -0.478       | 0.004        | 194              | 92          | -0.806 to -0.150      | -2.29        | 0.02    |
| Briken 2014               | 0.838        | 0.028        | 11               | 10          | 0.092 to 1.584        | 1.30         | 0.19    |
| Chan 2012                 | 0.866        | 0.015        | 17               | 16          | 0.168 to 1.564        | 1.43         | 0.15    |
| Conradsson 2015           | 0.599        | 0.006        | 45               | 42          | 0.173 to 1.026        | 1.07         | 0.28    |
| Duncan 2014               | 1.099        | 0.077        | 5                | 5           | -0.120 to 2.318       | 1.28         | 0.20    |
| Ho 2016                   | 0.141        | 0.416        | 102              | 49          | -0.198 to 0.480       | -0.30        | 0.77    |
| Hoang 2015                | 0.115        | 0.699        | 23               | 21          | -0.467 to 0.696       | -0.30        | 0.76    |
| Hoffman 2008              | 0.119        | 0.491        | 104              | 49          | -0.219 to 0.457       | -0.37        | 0.71    |
| Khatri 2001               | -0.288       | 0.186        | 42               | 42          | -0.714 to 0.138       | -1.53        | 0.13    |
| Lin 2015                  | 0.498        | 0.019        | 69               | 33          | 0.082 to 0.914        | 0.78         | 0.44    |
| Nilsagard 2013            | 0.316        | 0.156        | 41               | 39          | -0.120 to 0.753       | 0.24         | 0.81    |
| Oertel Knöchel 2014 (Dep) | 0.559        | 0.247        | 8                | 8           | -0.388 to 1.505       | 0.59         | 0.56    |
| Oertel Knöchel 2014 (Sz)  | 0.220        | 0.627        | 8                | 10          | -0.668 to 1.108       | -0.03        | 0.98    |
| Oken 2004                 | -0.041       | 0.862        | 37               | 20          | -0.505 to 0.423       | -0.78        | 0.44    |
| Picelli 2016              | 0.541        | 0.250        | 9                | 8           | -0.381 to 1.463       | 0.57         | 0.57    |
| Romenets 2015             | 0.418        | 0.225        | 18               | 15          | -0.258 to 1.095       | 0.42         | 0.67    |
| Sandroff 2016             | 0.202        | 0.724        | 5                | 5           | -0.921 to 1.325       | -0.05        | 0.96    |
| Suttanon 2012             | 0.461        | 0.143        | 19               | 21          | -0.156 to 1.077       | 0.55         | 0.58    |
| Yaguez 2011               | 0.414        | 0.170        | 15               | 12          | -0.177 to 1.005       | 0.45         | 0.65    |
|                           | <b>0.234</b> | <b>0.000</b> | <b>794</b>       | <b>519</b>  | <b>0.058 to 0.411</b> |              |         |

## Executive functioning

| Study            | Hedges' g    | p-value      | Intervention (N) | Control (N) | 95% CI per study      | Std residual | p-value |
|------------------|--------------|--------------|------------------|-------------|-----------------------|--------------|---------|
| Arcoverde 2014   | -0.596       | 0.098        | 10               | 10          | -1.303 to 0.111       | -2.10        | 0.04    |
| Bhatia 2017      | 0.000        | 1.000        | 194              | 92          | -0.248 to 0.248       | -1.36        | 0.17    |
| Briken 2014      | 0.496        | 0.245        | 11               | 10          | -0.340 to 1.332       | 0.82         | 0.41    |
| De Oliveira 2016 | 0.078        | 0.827        | 15               | 8           | -0.620 to 0.776       | -0.21        | 0.83    |
| Hoang 2015       | 0.053        | 0.858        | 23               | 21          | -0.528 to 0.634       | -0.34        | 0.73    |
| Hoffman 2008     | 0.185        | 0.191        | 104              | 49          | -0.092 to 0.462       | -0.26        | 0.79    |
| Khatri 2001      | 0.232        | 0.188        | 42               | 42          | -0.113 to 0.577       | 0.49         | 0.63    |
| Lin 2015         | 0.394        | 0.043        | 69               | 33          | 0.012 to 0.776        | 1.31         | 0.19    |
| Maci 2012        | 0.759        | 0.145        | 7                | 7           | -0.261 to 1.779       | 1.18         | 0.24    |
| Ohman 2016a      | 0.118        | 0.505        | 61               | 65          | -0.229 to 0.466       | -0.20        | 0.84    |
| Oken 2004        | 0.231        | 0.361        | 37               | 20          | -0.265 to 0.727       | 0.32         | 0.75    |
| Picelli 2016     | 0.532        | 0.192        | 9                | 8           | -0.267 to 1.331       | 0.94         | 0.34    |
| Sandroff 2016    | -0.382       | 0.445        | 5                | 5           | -1.362 to 0.598       | -1.07        | 0.28    |
| Thompson 2013    | 0.405        | 0.289        | 9                | 11          | -0.344 to 1.154       | 0.67         | 0.50    |
|                  | <b>0.151</b> | <b>0.013</b> | <b>596</b>       | <b>381</b>  | <b>0.032 to 0.270</b> |              |         |

## Memory

| Study                     | Hedges' g    | p-value      | Intervention (N) | Control (N) | 95% CI per study      | Std residual | p-value |
|---------------------------|--------------|--------------|------------------|-------------|-----------------------|--------------|---------|
| Arcoverde 2014            | -0.273       | 0.527        | 10               | 10          | -1.116 to 0.571       | -0.93        | 0.35    |
| Bhatia 2017               | 0.060        | 0.635        | 194              | 92          | -0.188 to 0.308       | -0.56        | 0.58    |
| Briken 2014               | 1.029        | 0.008        | 11               | 10          | 0.265 to 1.793        | 2.35         | 0.02    |
| Hoffman 2008              | 0.090        | 0.525        | 104              | 49          | -0.187 to 0.367       | -0.25        | 0.80    |
| Hoffmann 2015             | 0.063        | 0.618        | 102              | 88          | -0.185 to 0.311       | -0.53        | 0.59    |
| Khatri 2001               | 0.273        | 0.115        | 42               | 42          | -0.066 to 0.612       | 0.92         | 0.36    |
| Lin 2015                  | 0.264        | 0.170        | 69               | 33          | -0.113 to 0.641       | 0.77         | 0.44    |
| Oertel Knöchel 2014 (Dep) | 0.300        | 0.467        | 8                | 8           | -0.508 to 1.108       | 0.43         | 0.66    |
| Oertel Knöchel 2014 (Sz)  | 0.254        | 0.519        | 8                | 10          | -0.518 to 1.026       | 0.34         | 0.74    |
| Oken 2004                 | 0.000        | 1.000        | 37               | 20          | -0.540 to 0.540       | -0.46        | 0.65    |
| Thompson 2013             | -0.378       | 0.271        | 9                | 11          | -1.051 to 0.295       | -1.48        | 0.14    |
| Yaguez 2011               | 0.232        | 0.594        | 15               | 12          | -0.620 to 1.084       | 0.25         | 0.80    |
|                           | <b>0.123</b> | <b>0.038</b> | <b>609</b>       | <b>385</b>  | <b>0.007 to 0.238</b> |              |         |

## Psychomotor speed

| Study                     | Hedges' g | p-value | Intervention (N) | Control (N) | 95% CI per study | Std residual | p-value |
|---------------------------|-----------|---------|------------------|-------------|------------------|--------------|---------|
| Arcoverde 2014            | 0.402     | 0.353   | 10               | 10          | -0.446 to 1.251  | 0.39         | 0.69    |
| Briken 2014               | 0.464     | 0.275   | 11               | 10          | -0.370 to 1.298  | 0.54         | 0.59    |
| Hoang 2015                | 0.288     | 0.335   | 23               | 21          | -0.297 to 0.872  | 0.19         | 0.84    |
| Hoffman 2008              | 0.229     | 0.186   | 104              | 49          | -0.110 to 0.568  | 0.01         | 0.99    |
| Hoffmann 2015             | -0.034    | 0.788   | 102              | 88          | -0.282 to 0.214  | -1.55        | 0.12    |
| Holthoff 2015             | 1.257     | 0.001   | 15               | 15          | 0.492 to 2.023   | 2.54         | 0.01    |
| Khatri 2001               | 0.060     | 0.725   | 42               | 42          | -0.274 to 0.394  | -0.82        | 0.41    |
| Lin 2015                  | 0.436     | 0.040   | 69               | 33          | 0.020 to 0.852   | 0.87         | 0.38    |
| Oertel Knöchel 2014 (Dep) | 0.732     | 0.135   | 8                | 8           | -0.229 to 1.692  | 1.00         | 0.31    |
| Oertel Knöchel 2014 (Sz)  | 0.508     | 0.269   | 8                | 10          | -0.393 to 1.409  | 0.59         | 0.55    |
| Oken 2004                 | -0.121    | 0.632   | 37               | 20          | -0.617 to 0.375  | -1.26        | 0.20    |

|                       |              |              |            |            |                       |       |      |
|-----------------------|--------------|--------------|------------|------------|-----------------------|-------|------|
| Picelli 2016          | 0.192        | 0.677        | 9          | 8          | -0.714 to 1.099       | -0.07 | 0.94 |
| Romberg 2005          | 0.355        | 0.083        | 47         | 48         | -0.047 to 0.758       | 0.55  | 0.58 |
| Salhofer-Polanyi 2013 | 0.178        | 0.687        | 10         | 9          | -0.685 to 1.040       | -0.11 | 0.91 |
| Sandroff 2016         | 0.674        | 0.254        | 5          | 5          | -0.484 to 1.832       | 0.74  | 0.45 |
| Thompson 2013         | -0.211       | 0.573        | 9          | 11         | -0.944 to 0.522       | -1.12 | 0.26 |
|                       | <b>0.227</b> | <b>0.003</b> | <b>509</b> | <b>387</b> | <b>0.075 to 0.379</b> |       |      |

### Verbal fluency

| Study          | Hedges' g    | p-value      | Intervention (N) | Control (N) | 95% CI per study       | Std residual | p-value |
|----------------|--------------|--------------|------------------|-------------|------------------------|--------------|---------|
| Arcoverde 2014 | 0.570        | 0.193        | 10               | 10          | -0.288 to 1.428        | 0.66         | 0.51    |
| Briken 2014    | 0.594        | 0.166        | 11               | 10          | -0.247 to 1.436        | 0.72         | 0.47    |
| Hoffman 2008   | 0.168        | 0.268        | 104              | 49          | -0.129 to 0.465        | -0.25        | 0.81    |
| Hoffmann 2015  | -0.111       | 0.380        | 102              | 88          | -0.359 to 0.137        | -1.27        | 0.20    |
| Holthoff 2015  | 1.210        | 0.002        | 15               | 15          | 0.449 to 1.971         | 2.12         | 0.03    |
| Ohman 2016a    | -0.055       | 0.757        | 61               | 65          | -0.402 to 0.292        | -0.97        | 0.33    |
|                | <b>0.238</b> | <b>0.134</b> | <b>303</b>       | <b>237</b>  | <b>-0.074 to 0.551</b> |              |         |

### Global cognition

| Study              | Hedges' g    | p-value      | Intervention (N) | Control (N) | 95% CI per study       | Std residual | p-value |
|--------------------|--------------|--------------|------------------|-------------|------------------------|--------------|---------|
| Aguiar 2014        | 0.184        | 0.584        | 17               | 17          | -0.474 to 0.842        | -0.19        | 0.85    |
| Arcoverde 2014     | 1.681        | 0.000        | 10               | 10          | 0.820 to 2.542         | 2.03         | 0.04    |
| Busse 2013         | 0.260        | 0.534        | 9                | 13          | -0.561 to 1.082        | -0.06        | 0.95    |
| Hoffmann 2015      | 0.166        | 0.253        | 102              | 88          | -0.118 to 0.451        | -0.25        | 0.81    |
| Holthoff 2015      | -0.284       | 0.427        | 15               | 15          | -0.984 to 0.416        | -0.92        | 0.36    |
| Kemoun 2010        | 1.054        | 0.005        | 16               | 15          | 0.320 to 1.789         | 1.18         | 0.24    |
| Maci 2012          | -0.311       | 0.538        | 7                | 7           | -1.298 to 0.677        | -0.84        | 0.40    |
| Ohman 2016a        | -0.034       | 0.847        | 61               | 65          | -0.382 to 0.313        | -0.61        | 0.54    |
| Picelli 2016       | 0.285        | 0.539        | 9                | 8           | -0.624 to 1.194        | -0.02        | 0.98    |
| Quinn 2014         | 0.047        | 0.899        | 15               | 13          | -0.674 to 0.768        | -0.40        | 0.69    |
| Romenets 2015      | 0.368        | 0.285        | 18               | 15          | -0.307 to 1.042        | 0.11         | 0.91    |
| Silva-Batista 2016 | 1.450        | 0.000        | 26               | 13          | 0.693 to 2.207         | 1.78         | 0.08    |
| Venturelli 2011    | -2.400       | 0.000        | 11               | 10          | -3.497 to -1.303       | -3.53        | 0.00    |
| Vreugdenhil 2012   | 0.505        | 0.065        | 20               | 20          | -0.032 to 1.042        | 0.35         | 0.73    |
| Zhang 2004         | 0.815        | 0.000        | 40               | 40          | 0.363 to 1.267         | 0.91         | 0.36    |
|                    | <b>0.299</b> | <b>0.076</b> | <b>376</b>       | <b>349</b>  | <b>-0.031 to 0.629</b> |              |         |
